# Supplementary material for: On the decay time of upconversion luminescence
Source: Royal Society of Chemistry journal article supplement (doi:10.1039/c8nr10332a), 2019-01-01
Supplement: c8nr10332a1.pdf [file c8nr10332a1.pdf]

# On the decay time of upconversion luminescence

*Jan Bergstrand,<sup>b</sup> Qingyun Liu,<sup>a</sup> Bingru Huang,<sup>c</sup> Xingyun Peng,<sup>c</sup> Christian Würth,<sup>d</sup> Ute Resch-  
Genger,<sup>d</sup> Qiuqiang Zhan,<sup>\*c</sup> Jerker Widengren,<sup>b</sup> Hans Ågren,<sup>a,e</sup> Haichun Liu<sup>\*a</sup>*

<sup>a</sup> Department of Theoretical Chemistry and Biology, KTH Royal Institute of Technology, S-10691 Stockholm, Sweden

<sup>b</sup> Department of Applied Physics, KTH Royal Institute of Technology, S-10691, Stockholm, Sweden

<sup>c</sup> Centre for Optical and Electromagnetic Research, Guangdong Provincial Key Laboratory of Optical Information Materials and Technology, South China Academy of Advanced Optoelectronics, South China Normal University, Guangzhou 510006, China

<sup>d</sup> Federal Institute of Materials Research and Testing (BAM), Division of Biophotonics, Richard-Willstätter-Str. 11, 12489 Berlin, Germany

<sup>e</sup> School of Chemical Engineering and Technology, Harbin Institute of Technology, Harbin, Heilongjiang 150001, China

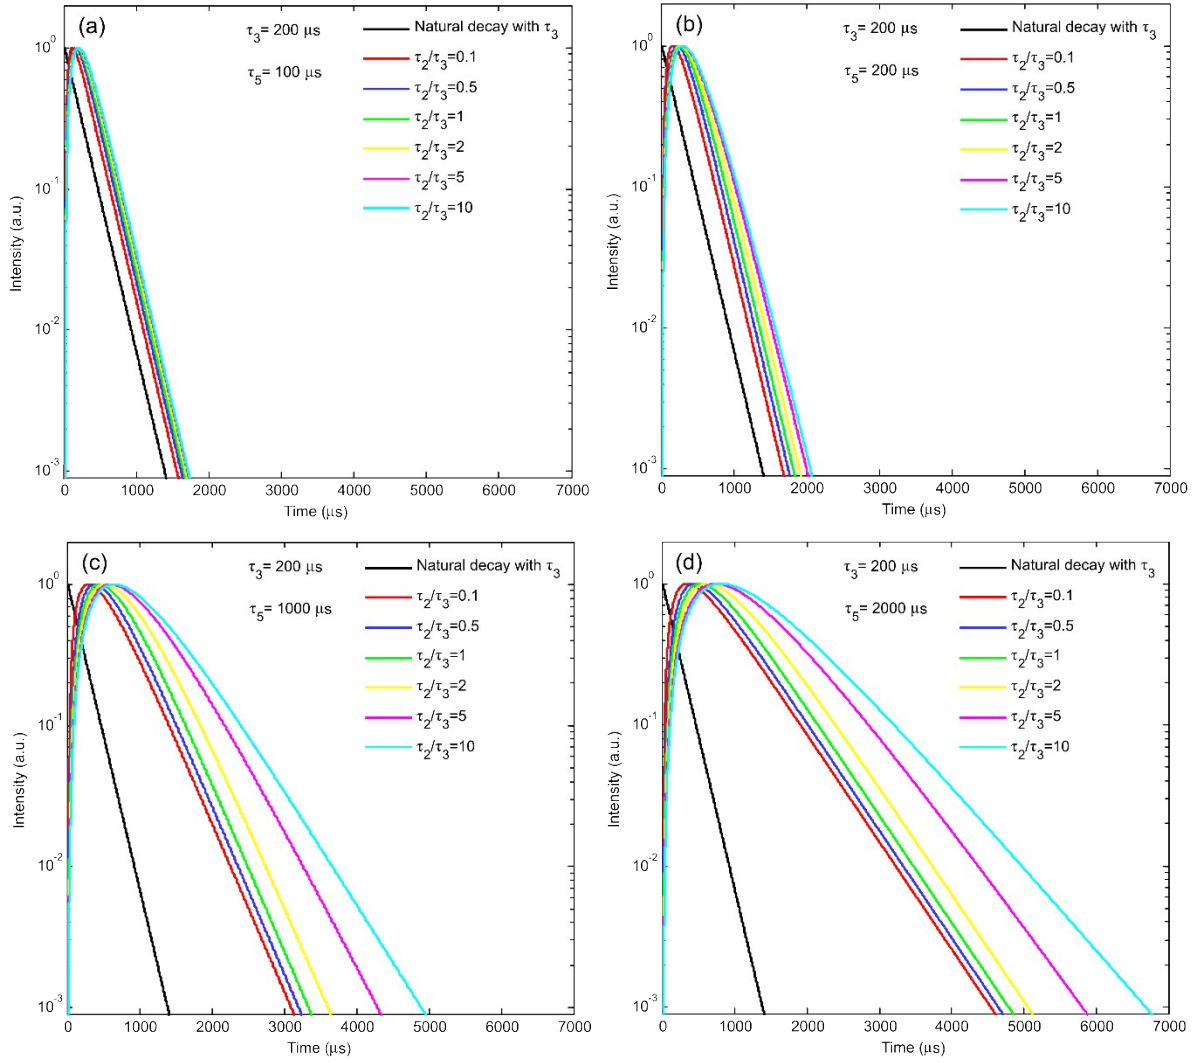

**Figure S1** UCL decay profiles under short-pulse upconversion excitation with different  $\tau_2/\tau_3$ , given that (a)  $\tau_5 = 100 \mu\text{s}$ , (b)  $\tau_5 = 200 \mu\text{s}$ , (c)  $\tau_5 = 1000 \mu\text{s}$ , and (d)  $\tau_5 = 2000 \mu\text{s}$

**Table S1** Summary of constant parameters used in the simulations studying the effect of the doping levels of activator ions

| $\sigma$ (cm <sup>2</sup> ) | $n_S$ (cm <sup>-3</sup> ) | $\tau_2$ (ms) | $\tau_3$ (ms) | $\tau_5$ (ms) | $W_1$ (cm <sup>3</sup> s <sup>-1</sup> ) | $W_2$ (cm <sup>3</sup> s <sup>-1</sup> ) |
|-----------------------------|---------------------------|---------------|---------------|---------------|------------------------------------------|------------------------------------------|
| $1.5 \times 10^{-20}$       | $1.5 \times 10^{21}$      | 1.32          | 0.2           | 1.32          | $2.5 \times 10^{-18}$                    | $5 \times 10^{-17}$                      |

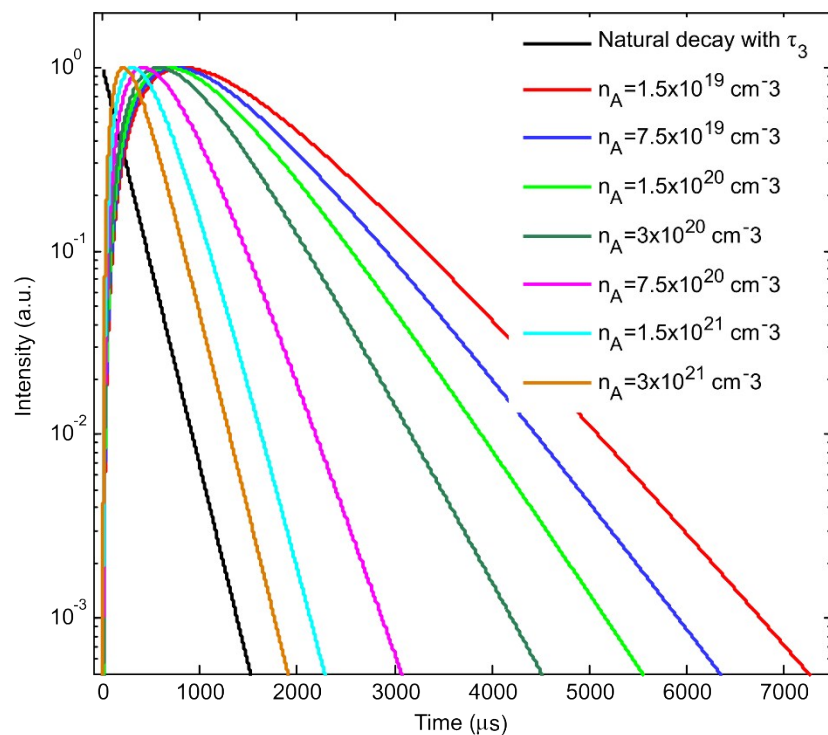

**Figure S2** Upconversion luminescence decay profiles under short pulse excitation with different doping levels of activator ions

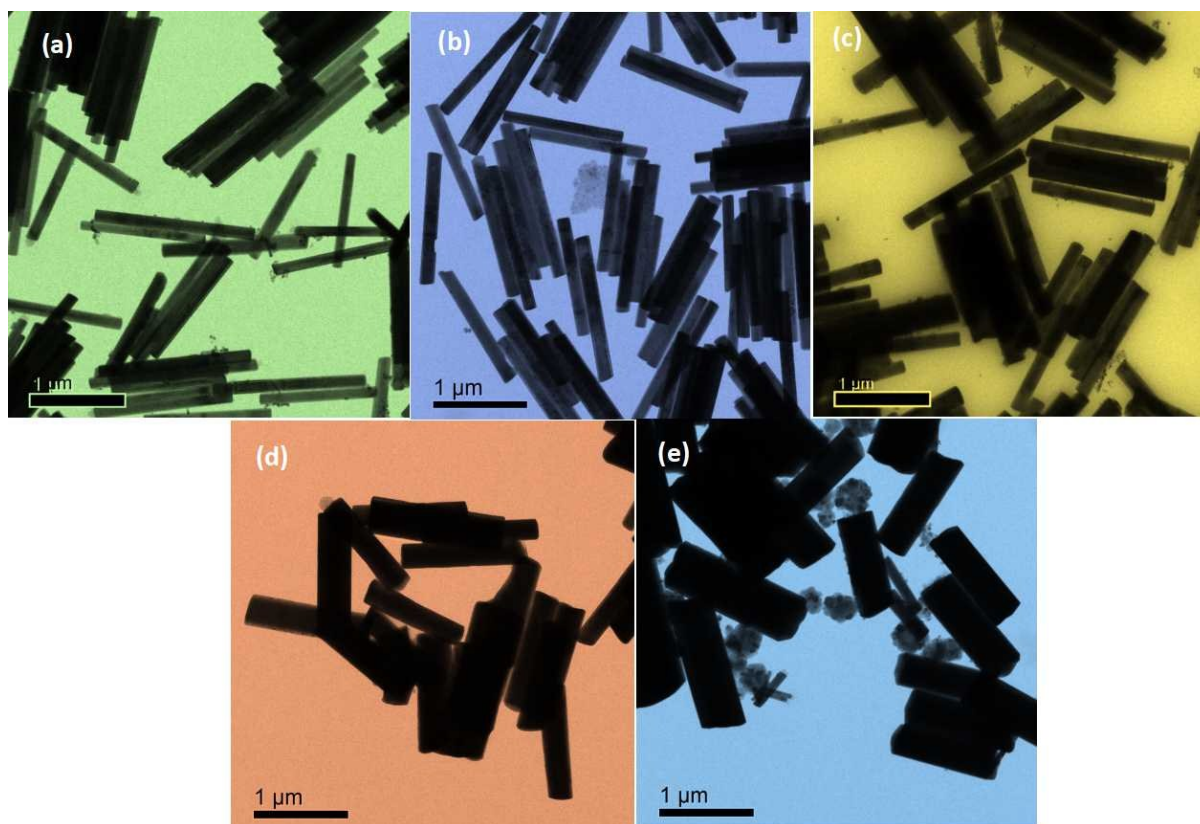

**Figure S3** Transmission electron microscopic images of (a) NaYF<sub>4</sub>:2% Yb<sup>3+</sup>, 5% Er<sup>3+</sup>, (b) NaYF<sub>4</sub>:6% Yb<sup>3+</sup>, 5% Er<sup>3+</sup>, (c) NaYF<sub>4</sub>:20% Yb<sup>3+</sup>, 5% Er<sup>3+</sup>, (d) NaYF<sub>4</sub>:50% Yb<sup>3+</sup>, 5% Er<sup>3+</sup>, and (e) NaYF<sub>4</sub>:80% Yb<sup>3+</sup>, 5% Er<sup>3+</sup> nanorods
